# Supplementary material for: Cow’s Milk-Related Symptom Score (CoMiSS): From Bristol to Brussels Stool Scale
Source: PubMed Central journal article supplement — J Pediatr Gastroenterol Nutr. 2023 Sep 6;77(5):618–22. doi: 10.1097/MPG.0000000000003932 (PMC10583930; doi:10.1097/mpg.0000000000003932), 2023-09-06
Supplement: mpg-77-618-s001.pdf [file mpg-77-618-s001.pdf]

**Supplemental Table 1 : Original CoMiSS with BITSS**

| <b>Crying</b>      |   |
|--------------------|---|
| ≤1 hour/day        | 0 |
| 1 to 1.5 hours/day | 1 |
| 1.5 to 2 hours/day | 2 |
| 2 to 3 hours/day   | 3 |
| 3 to 4 hours/day   | 4 |
| 4 to 5 hours/day   | 5 |
| ≥5 hours/day       | 6 |

| <b>Regurgitation</b>                                                                  |   |
|---------------------------------------------------------------------------------------|---|
| 0 to 2 episodes/day                                                                   | 0 |
| ≥3 to ≤5 of small volume                                                              | 1 |
| >5 episodes of >1 coffee spoon                                                        | 2 |
| >5 episodes of ± half of the feed in <half of the feedings                            | 3 |
| Continuous regurgitations of small volume >30min after each feeding                   | 4 |
| Regurgitation of half to complete volume of a feeding in at last half of the feedings | 5 |
| Regurgitation of the "complete feeding" after each feeding                            | 6 |

| <b>Stools (Bristol scale)</b>                    |   |
|--------------------------------------------------|---|
| Type 1 and 2 (hard stools)                       | 4 |
| Type 3 and 4 (normal stools)                     | 0 |
| Type 5 (soft stool)                              | 2 |
| Type 6 (liquid stool, if unrelated to infection) | 4 |
| Type 7 (watery stools)                           | 6 |

| <b>Skin Symptoms</b>       |        |      |          |        |
|----------------------------|--------|------|----------|--------|
| Atopic eczema              | absent | mild | moderate | severe |
| Head, neck and trunk       | 0      | 1    | 2        | 3      |
| Arms, hands, legs and feet | 0      | 1    | 2        | 3      |

| Urticaria | no | yes |
|-----------|----|-----|
|           | 0  | 6   |

| <b>Respiratory symptoms</b> |   |
|-----------------------------|---|
| No respiratory symptoms     | 0 |
| Slight symptoms             | 1 |
| Mild symptoms               | 2 |
| Severe symptoms             | 3 |
