# Supplementary material for: Cow’s Milk-Related Symptom Score (CoMiSS): From Bristol to Brussels Stool Scale
Source: PubMed Central journal article supplement — J Pediatr Gastroenterol Nutr. 2023 Sep 6;77(5):618–22. doi: 10.1097/MPG.0000000000003932 (PMC10583930; doi:10.1097/mpg.0000000000003932), 2023-09-06
Supplement: mpg-77-618-s002.pdf [file mpg-77-618-s002.pdf]

**Supplemental Table 2:** Comparison of CoMiSS-BSFS and CoMiSS-BITSS sets according to CoMiSS-BSFS cut-off values

| CoMiSS value | N° CoMiSS-BSFS | Pearson Correlation Coefficient | 95% CI       | CoMiSS-BSFS vs CoMiSS-BITSS* | Cohen's <i>d</i> ** |
|--------------|----------------|---------------------------------|--------------|------------------------------|---------------------|
| ≤1           | 63             | 0.47                            | 0.25; 0.64   | <i>p</i> =0.011              | 0.43                |
| ≤2           | 231            | -0.14                           | -0.25; 0.012 | <i>p</i> <0.001              | 1.39                |
| ≤3           | 290            | 0.18                            | 0.07; 0.29   | <i>p</i> <0.001              | 1.29                |
| ≤4           | 438            | 0.71                            | 0.66; 0.76   | <i>p</i> <0.001              | 0.59                |
| ≤5           | 540            | 0.81                            | 0.79; 0.84   | <i>p</i> <0.001              | 0.43                |
| ≥6           | 304            | 0.98                            | 0.97; 0.98   | <i>p</i> =0.81               | 0.004               |
| ≥7           | 202            | 0.97                            | 0.96; 0.97   | <i>p</i> =0.44               | 0.01                |
| ≥8           | 142            | 0.96                            | 0.94; 0.97   | <i>p</i> =0.59               | 0.01                |
| ≥9           | 95             | 0.94                            | 0.92; 0.96   | <i>p</i> =0.23               | 0.04                |
| ≥10          | 57             | 0.94                            | 0.89; 0.96   | <i>p</i> =0.48               | 0.04                |
| ≥11          | 37             | 0.90                            | 0.82; 0.95   | <i>p</i> =0.77               | 0.04                |
| ≥12          | 23             | 0.85                            | 0.68; 0.94   | <i>p</i> =0.84               | 0.00                |
| All scores   | 844            | 0.96                            | 0.95; 0.96   | <i>p</i> <0.001              | 0.15                |

**Legend:**\* Wilcoxon Signed-Rank test for the CoMiSS-BSFS value and pairwise CoMiSS-BITSS; N° – number; vs-versus; CI – confidence interval; Cohen's convention: small effect size  $d \leq 0.2$ ; medium effect size  $d = (0.2; 0.8)$ ; large effect size  $d \geq 0.8$
