# Supplementary material for: Cow’s Milk-Related Symptom Score (CoMiSS): From Bristol to Brussels Stool Scale
Source: PubMed Central journal article supplement — J Pediatr Gastroenterol Nutr. 2023 Sep 6;77(5):618–22. doi: 10.1097/MPG.0000000000003932 (PMC10583930; doi:10.1097/mpg.0000000000003932), 2023-09-06
Supplement: mpg-77-618-s004.pdf [file mpg-77-618-s004.pdf]

**Supplemental Table 3:** Changes of CoMiSS-BSFS and COMISS-BITSS values according to CoMiSS-BSFS values

| Change from BSFS to BITSS | Difference BITSS - BSFS | CoMiSS BSFS $\leq 1$ (N) | CoMiSS BSFS $\leq 2$ (N) | CoMiSS BSFS $\leq 3$ (N) | CoMiSS BSFS $\leq 4$ (N) | CoMiSS BSFS $\leq 5$ (N) | CoMiSS BSFS $\geq 6$ (N) |
|---------------------------|-------------------------|--------------------------|--------------------------|--------------------------|--------------------------|--------------------------|--------------------------|
| 0 to 0                    | 0                       | 56                       | 62                       | 65                       | 65                       | 65                       | 3                        |
| 2 to 0                    | -2                      | 0                        | 159                      | 212                      | 236                      | 243                      | 4                        |
| 4 to 0                    | -4                      | 0                        | 0                        | 0                        | 1                        | 1                        | 0                        |
| 0 to 4                    | 4                       | 7                        | 7                        | 7                        | 9                        | 9                        | 0                        |
| 2 to 4                    | 2                       | 0                        | 3                        | 6                        | 10                       | 11                       | 9                        |
| 4 to 4                    | 0                       | 0                        | 0                        | 0                        | 117                      | 211                      | 184                      |
| 6 to 4                    | -2                      | 0                        | 0                        | 0                        | 0                        | 4                        | 0                        |
| 6 to 6                    | 0                       | 0                        | 0                        | 0                        | 0                        | 0                        | 100                      |
