# Supplementary figures and images for: Cow’s Milk-Related Symptom Score (CoMiSS): From Bristol to Brussels Stool Scale
Source: PubMed Central journal article supplement — J Pediatr Gastroenterol Nutr. 2023 Sep 6;77(5):618–22. doi: 10.1097/MPG.0000000000003932 (PMC10583930; doi:10.1097/mpg.0000000000003932), 2023-09-06

**Supplemental Figure 1:** Difference between CoMiSS-BSFS and CoMiSS-BITSS according to cut-offs

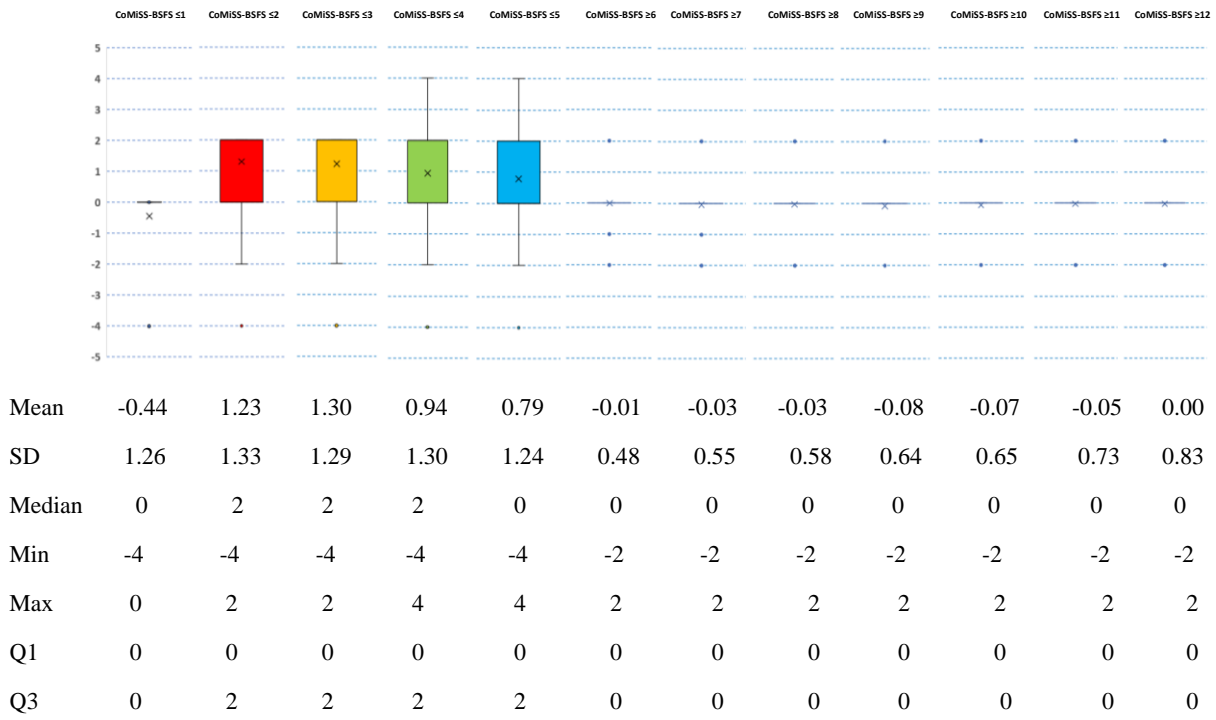

Supplement: mpg-77-618-s003.pdf [file mpg-77-618-s003.pdf]
